# Supplementary material for: Measurement report: Nocturnal subsidence behind the cold front enhances surface particulate matter in plains regions: observations from the mobile multi-lidar system
Source: Copernicus journal article supplement (doi:10.5194/acp-24-2267-2024), 2024-02-22
Supplement: Supplementary file 1 [file acp-24-2267-2024-supplement.pdf]

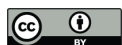

*Supplement of*

**Measurement report: Nocturnal subsidence behind the cold front enhances surface particulate matter in plains regions: observations from the mobile multi-lidar system**

**Yiming Wang et al.**

*Correspondence to:* Haichao Wang ([wanghch27@mail.sysu.edu.cn](mailto:wanghch27@mail.sysu.edu.cn)) and Shaojia Fan ([eesfsj@mail.sysu.edu.cn](mailto:eesfsj@mail.sysu.edu.cn))

The copyright of individual parts of the supplement might differ from the article licence.

## Supporting information

### Contents

**Figure S1.** The comparison of model results (color map) with observations (color points) for monthly mean  $PM_{2.5}$  values and the correlation coefficient (R) between model and observation.

**Figure S2.** Daily averaged concentration of  $PM_{2.5}$  on 12 December in China

**Figure S3.** Sea level pressure field on 12, 13 December in Changzhou

**Figure S4.** Daily averaged concentration of  $PM_{2.5}$  on 18 December in China

**Figure S5.** Sea level pressure field on 18, 19 December in Wangdu

**Figure S6.** Daily averaged concentration of  $PM_{2.5}$  on 20 December in China

**Figure S7.** Sea level pressure field on 20, 21 December in Wangdu

**Figure S8.** The average sea level pressure field of all T-NPES events in Changzhou

**Figure S9.** The average sea level pressure field of all T-NPES events in Wangdu

**Figure S10.** Backward trajectories of Chengdu, ending at 0:00 on 7, 8 January

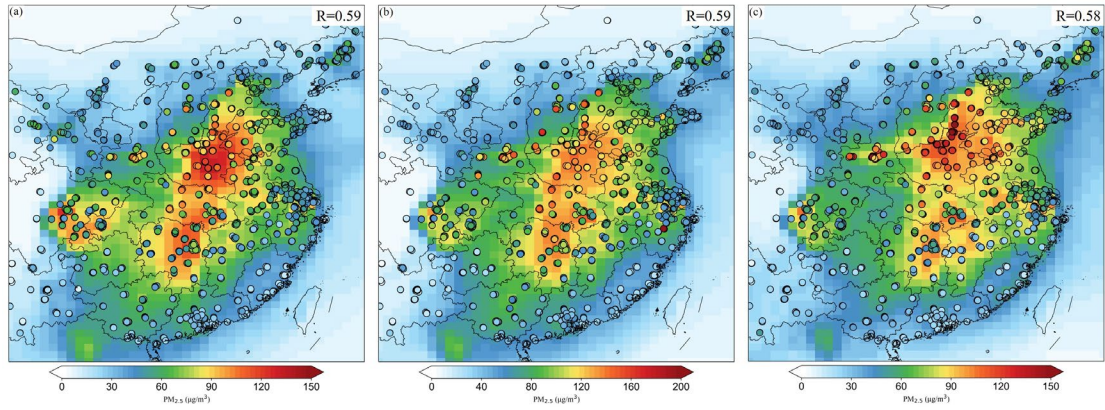

**Figure S1.** The comparison of model results (color map) with observations (color points) for monthly mean  $PM_{2.5}$  values and the correlation coefficient (R) between model and observation. (a) 2018.12, (b) 2019.01, (c) 2019.02

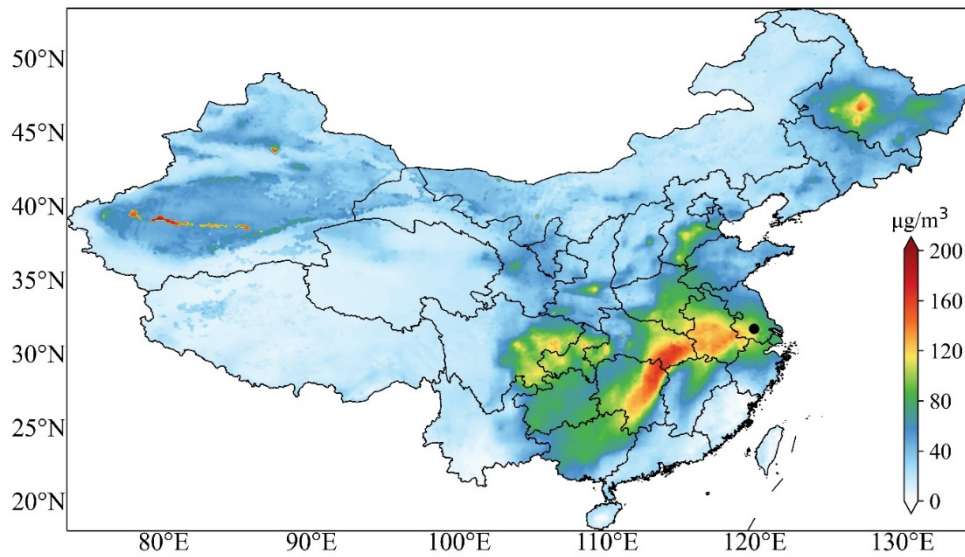

**Figure S2.** Daily averaged concentration of  $PM_{2.5}$  (shaded, unit:  $\mu\text{g}/\text{m}^3$ ) on 12 December in China. The dark dot represents the observation site in Changzhou.

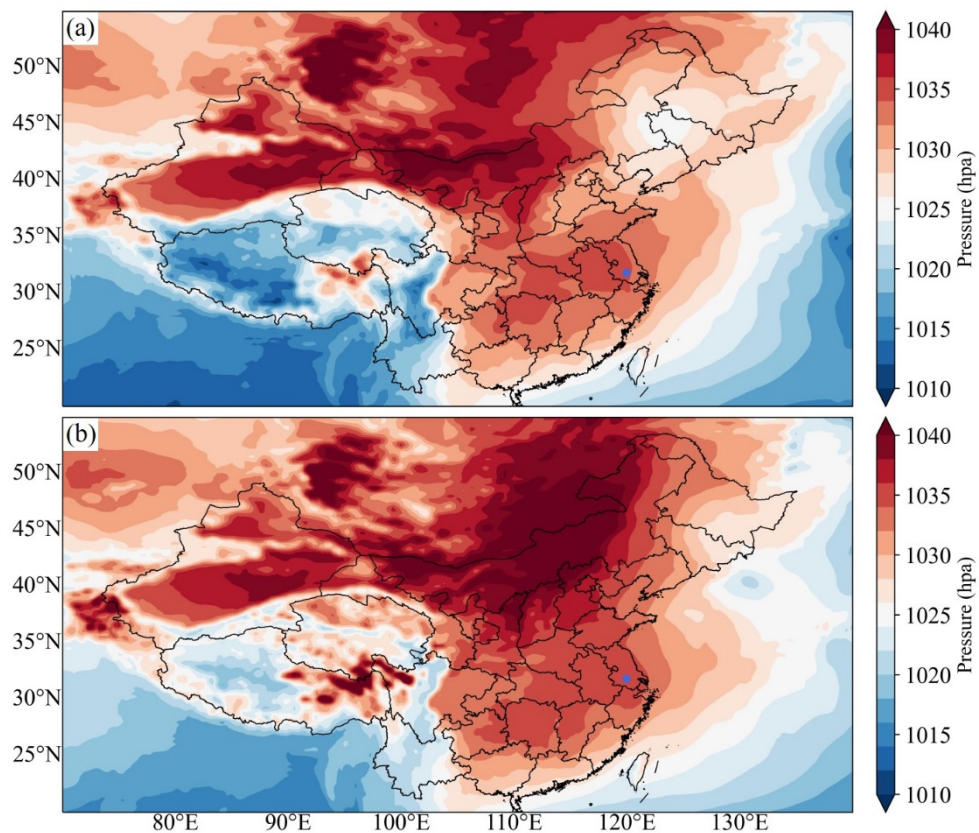

**Figure S3.** Sea level pressure (shaded, unit: hPa) field on (a) 20:00, 12 December and (b) 8:00, 13 December.

The blue dot represents the observation site in Changzhou.

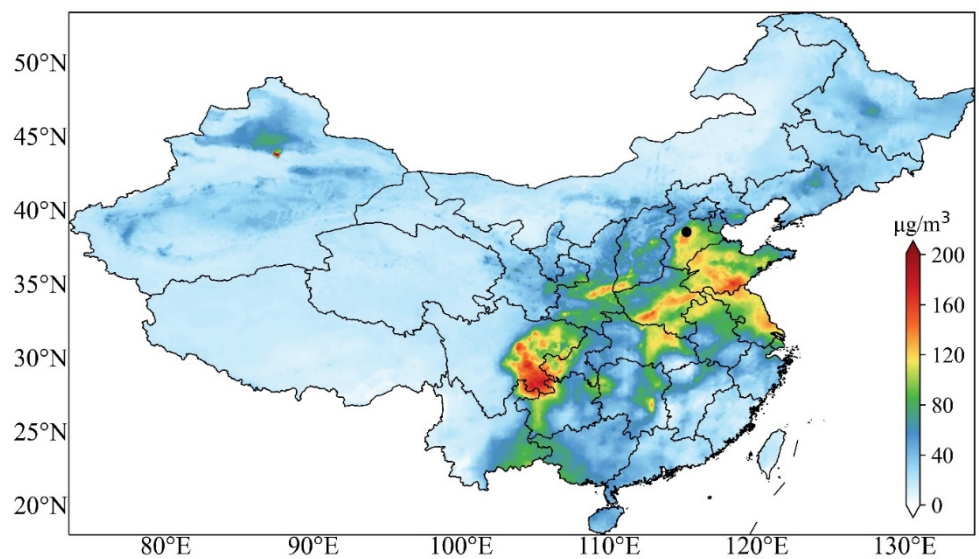

**Figure S4.** Daily averaged concentration of PM<sub>2.5</sub> (shaded, unit: µg/m<sup>3</sup>) on 18 December in China. The dark dot represents the observation site in Wangdu.



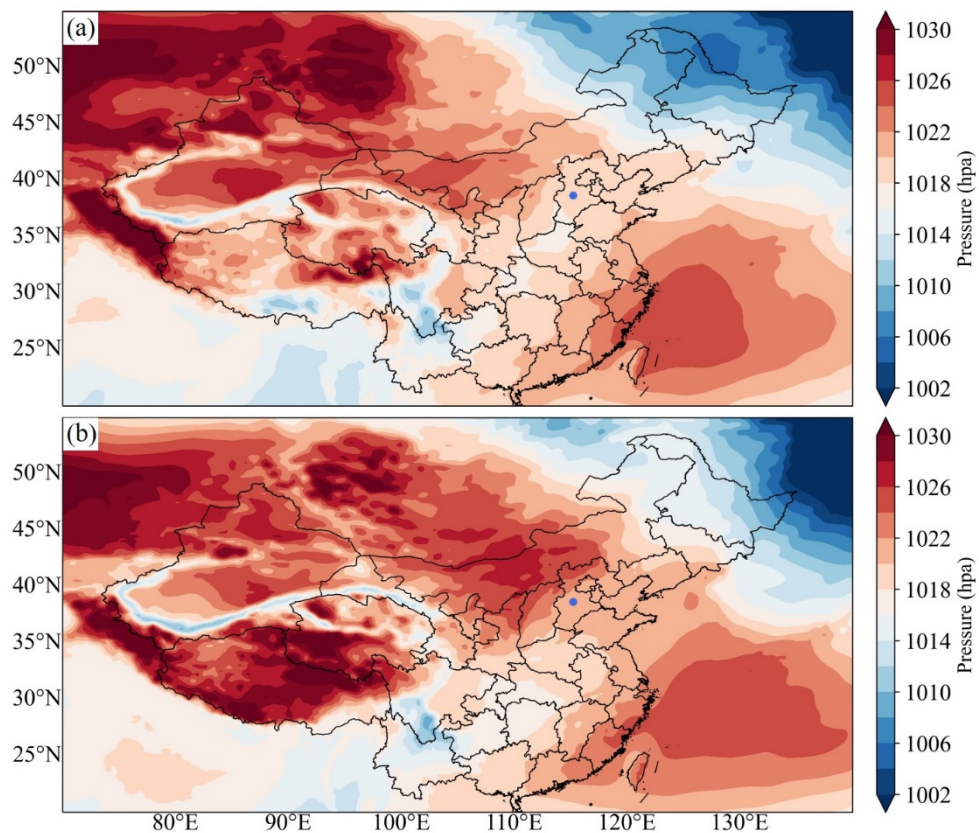

**Figure S5.** Sea level pressure (shaded, unit: hPa) field on (a) 20:00, 18 December and (b) 8:00, 19 December.

The blue dot represents the observation site in Wangdu.

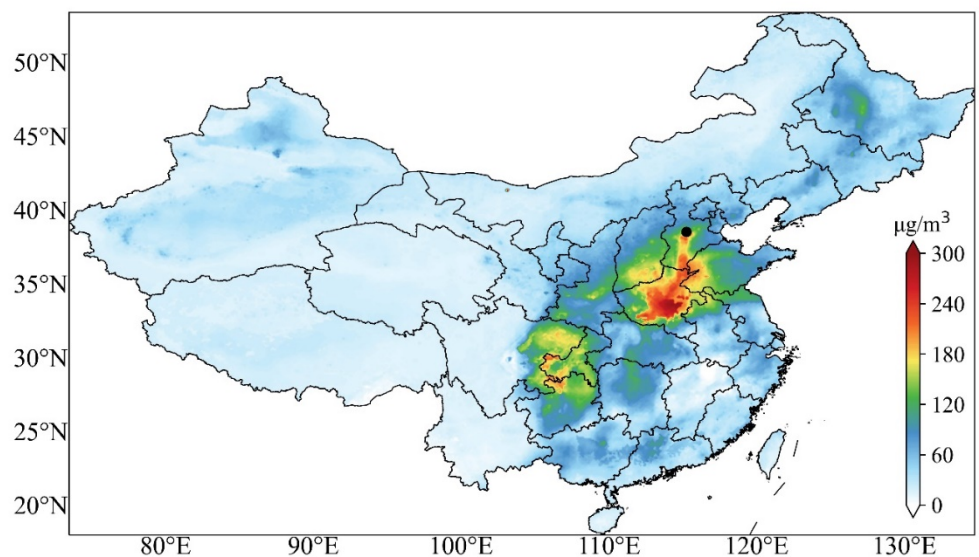

**Figure S6.** Daily averaged concentration of PM<sub>2.5</sub> (shaded, unit: µg/m<sup>3</sup>) on 20 December in China. The dark dot represents the observation site in Wangdu.

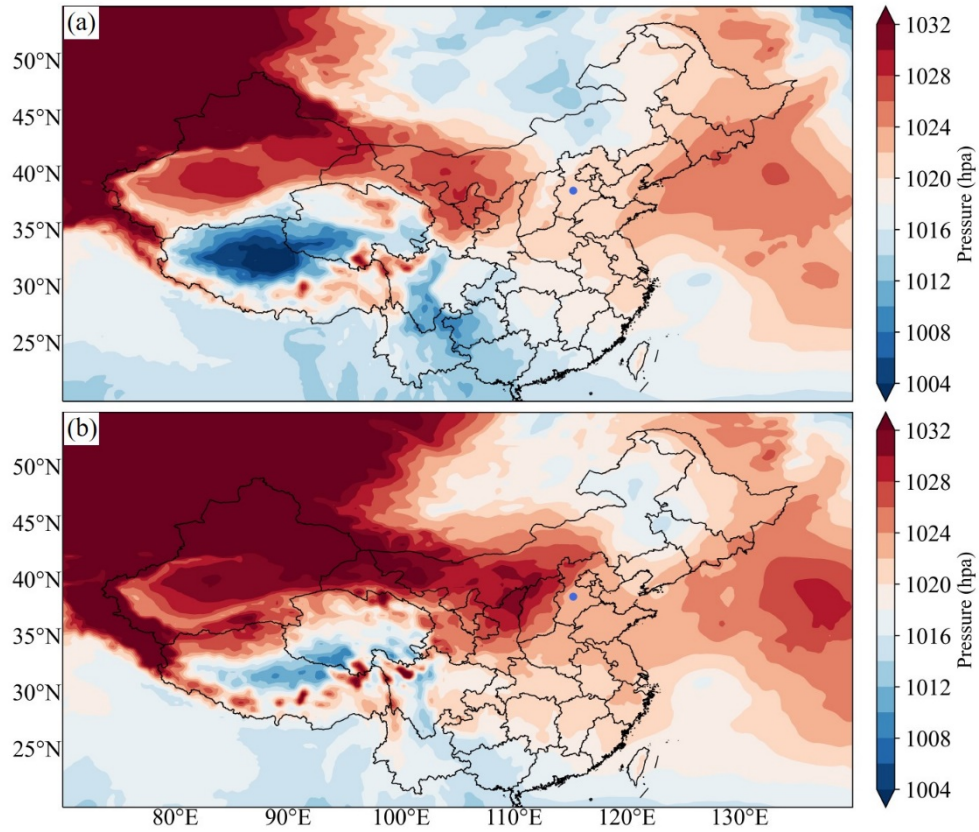

**Figure S7.** Sea level pressure (shaded, unit: hPa) field on (a) 20:00, 20 December and (b) 8:00, 21 December. The blue dot represents the observation site in Wangdu.

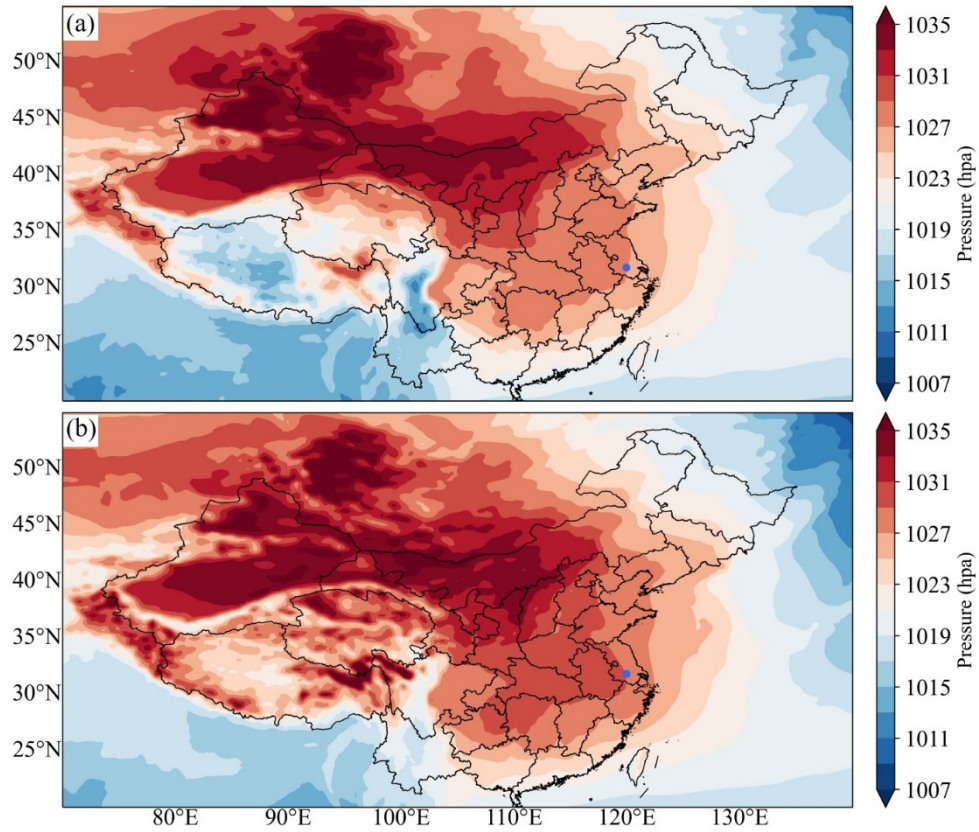

**Figure S8.** The average sea level pressure (shaded, unit: hPa) field on (a) 20:00 and (b) 8:00 in next day of all T-NPES events in Changzhou. The blue dot represents the observation site in Changzhou.



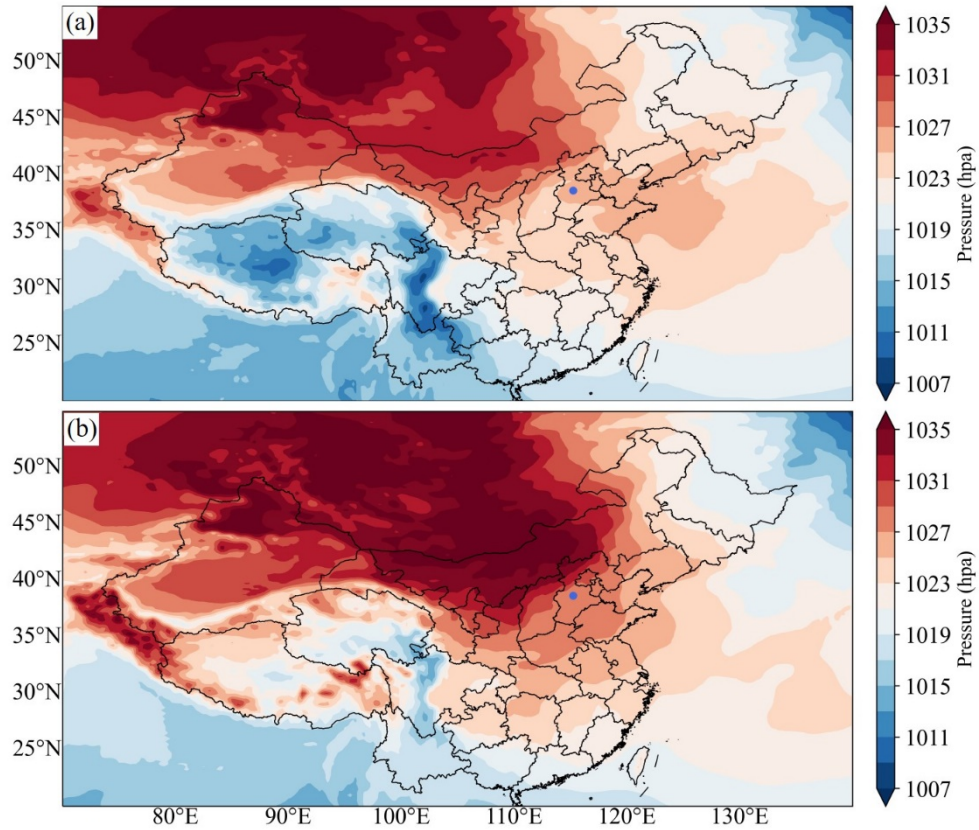

**Figure S9.** The average sea level pressure (shaded, unit: hPa) field on (a) 20:00 and (b) 8:00 in next day of all T-NPES events in Wangdu. The blue dot represents the observation site in Wangdu.

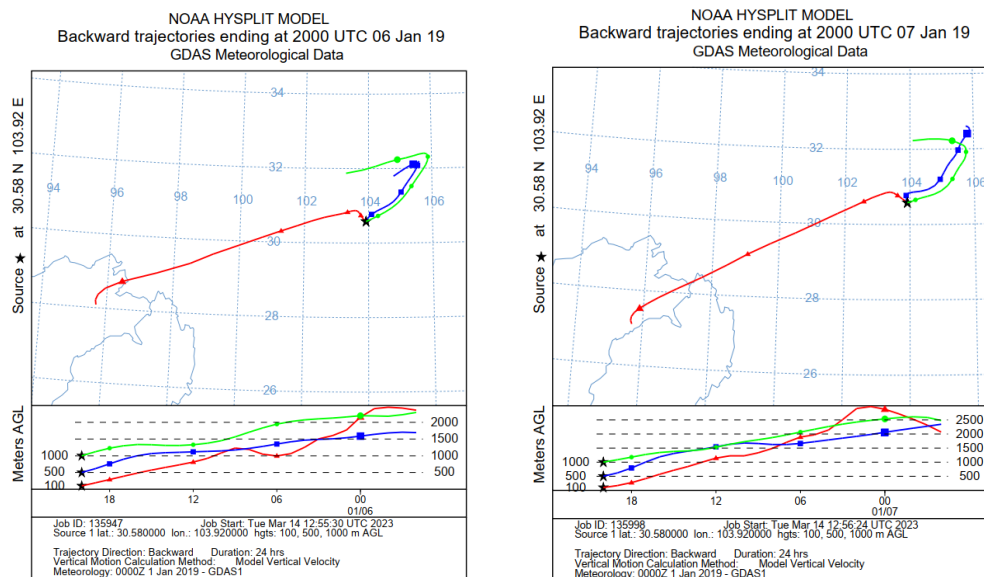

**Figure S10.** Backward trajectories of Chengdu at 100, 500, and 1000 m, ending at 0:00 on 7 and 8 January, determined by the HYSPLIT model.
